# Supplementary material for: A two-dimensional superlattice membrane enables high-performance desalination and enhanced Li ion selectivity
Source: Royal Society of Chemistry journal article supplement (doi:10.1039/d2cc03640a), 2022-01-01
Supplement: d2cc03640a1.pdf [file d2cc03640a1.pdf]

Electronic Supplementary Material (ESI) for Chemical Communications.

This journal is © The Royal Society of Chemistry 2022

## Supplementary information

### Two-dimensional superlattice membrane enables high-performance desalination and enhanced Li ion selectivity

Lvyang Cheng,<sup>‡a</sup> Lei Dong,<sup>‡\*\*a</sup> Yinjie Lv,<sup>a</sup> Tianyi Gao,<sup>a</sup> Yingjie He,<sup>a</sup> Cong Wu,<sup>a</sup> Xin Chen,<sup>a</sup> Yue Zhang,<sup>a</sup> Wenbo Zhai,<sup>a</sup> Yuanyuan Cui,<sup>\*b</sup> Wei Liu <sup>\*a</sup>

<sup>a</sup>School of Physical Science and Technology, ShanghaiTech University, Shanghai 201210, China

E-mail: [liuwei1@shanghaitech.edu.cn](mailto:liuwei1@shanghaitech.edu.cn), [donglei@nwpu.edu.cn](mailto:donglei@nwpu.edu.cn)

<sup>b</sup>School of Materials Science and Engineering, Shanghai University, Shanghai 200444, China.

E-mail: [cui-yy@shu.edu.cn](mailto:cui-yy@shu.edu.cn)

### Acknowledgement

L.C. and L.D. carried out the experiments, characterizations, data analysis, and manuscript preparation. Y.H. conducted the SEM. C.W. conducted the depth-profiled XPS. T.G helped to draw figure in Materials Studio. Y.L. helped to prepare samples. Y.C. calculated GO-MoS<sub>2</sub> system in VASP by DFT. L.D. and W.L. managed the project, reviewed the results, and conducted data analysis and manuscript preparation.

The authors gratefully acknowledge financial support from ShanghaiTech setup funding, National Natural Science Foundation of China (51972206). We also acknowledge the Center for High resolution Electron Microscopy (C $\hbar$ EM), SPST of ShanghaiTech University (#EM02161943), Shanghai Science and Technology Plan (21DZ2260400), for support.

## Contents:

### 1. Scheme and Figures

### 2. Experimental section

#### 2.1 Fabrication of GO-MoS<sub>2</sub> superlattice-structured membranes

#### 2.2 Rejections and Desalination Performance Evaluation

#### 2.3 Characterizations

#### 2.4 Computational methods

### 3. References

### 1. Scheme and Figures

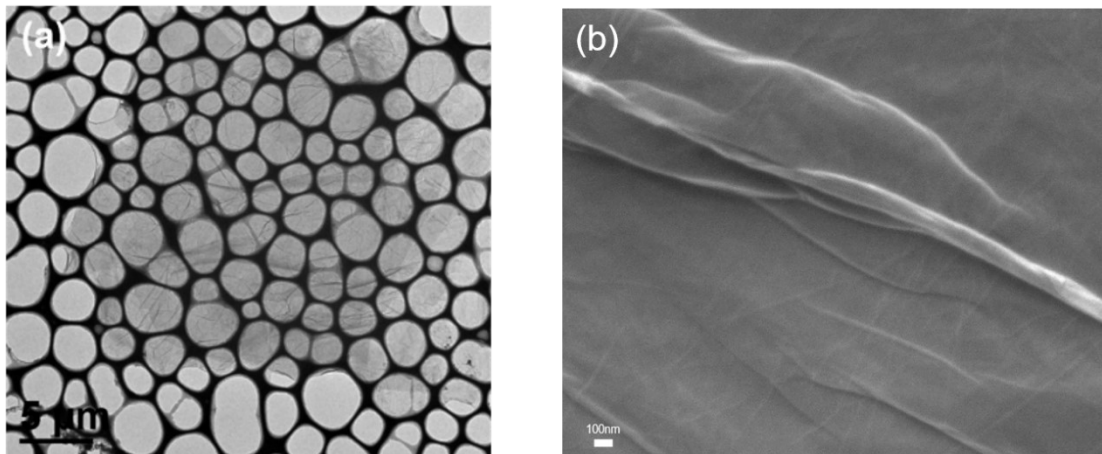

Figure S1. TEM image of GO nanosheet and (b) top side SEM of GO.

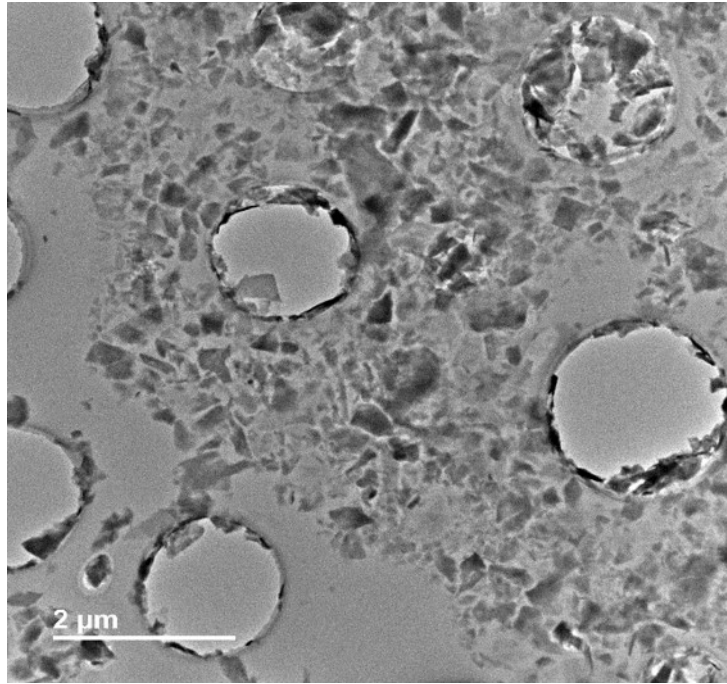

**Figure S2.** TEM image of MoS<sub>2</sub> nanosheets.

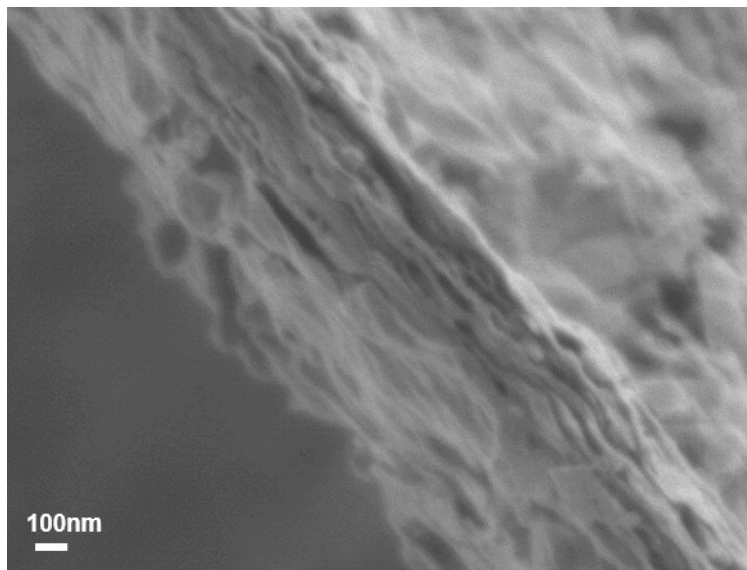

**Figure S3.** SEM image of GO-MoS<sub>2</sub> shows layer-stacked superlattice structure.

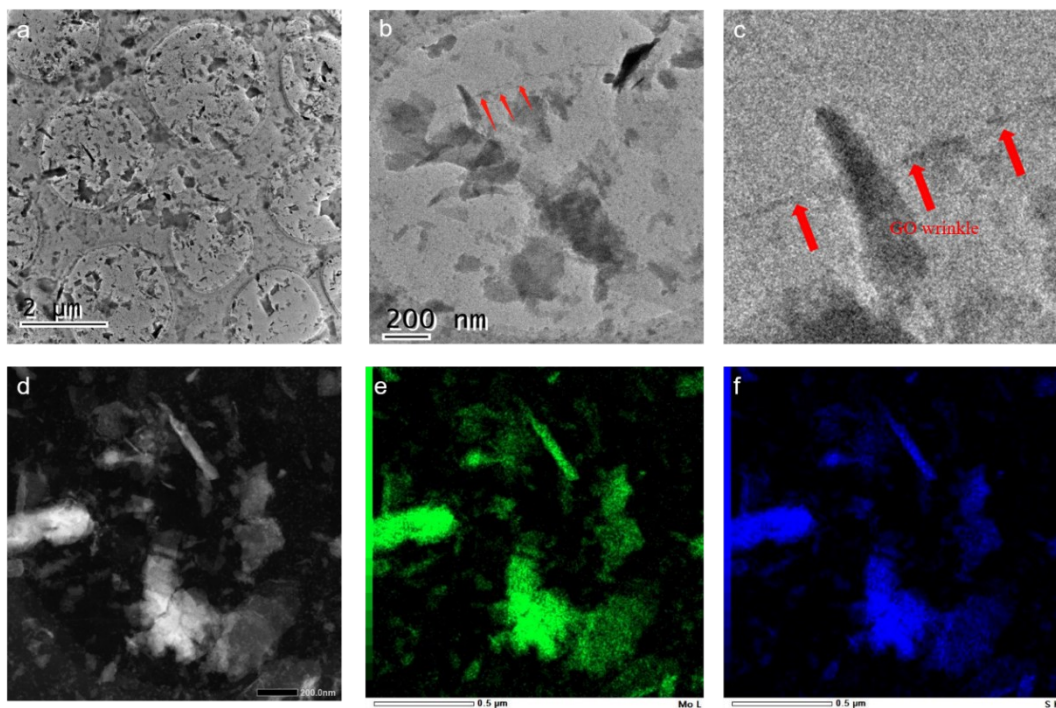

**Figure S4.** (a-c) TEM images of assembled GO-MoS<sub>2</sub> nanosheets. A drop of GO-MoS<sub>2</sub> mixture solution was added on the Cu grid for characterization. Here, small-sized MoS<sub>2</sub> nanosheets (< 0.5 μm) are loaded onto large-sized GO nanosheet (> 10 μm). Winkles of GO was marked because of the low-contrast of single-layered GO sheet. (d-f) EDS mapping of Mo (e) and S (f) elements. The corresponding TEM image is shown in d.

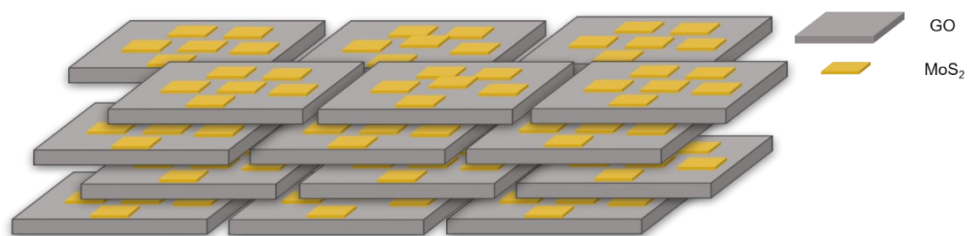

**Figure S5.** Schematic illustration of the self-assembled GO-MoS<sub>2</sub> superlattice membrane.

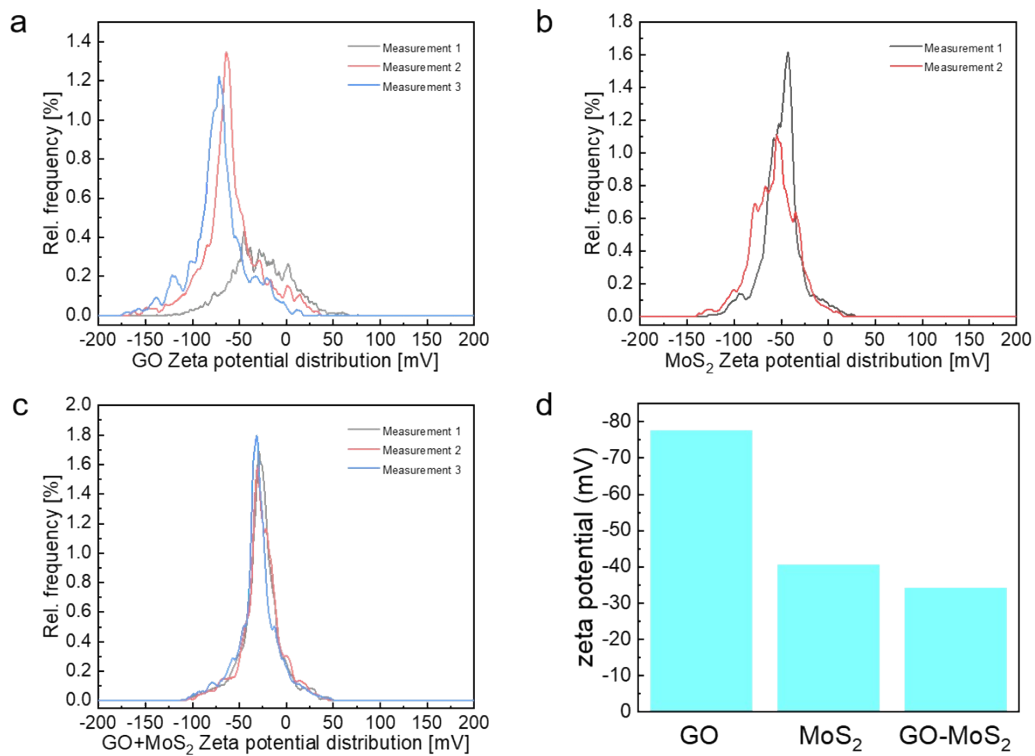

Figure S6. Zeta potential of GO (a), MoS<sub>2</sub> (b) and GO-MoS<sub>2</sub> (c) before filtration.

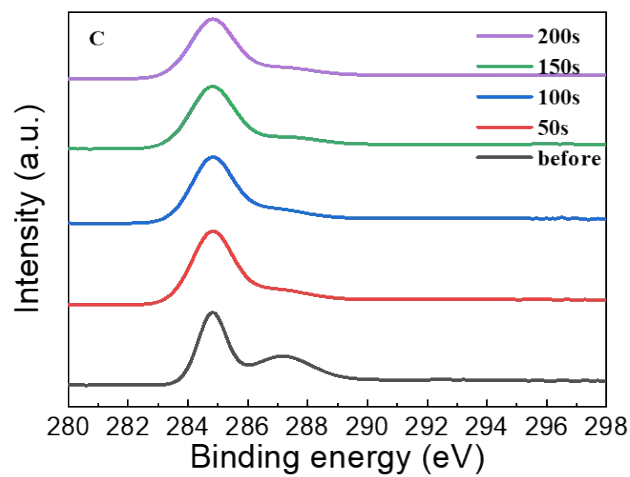

Figure S7. Depth-profiled XPS of Carbon curves with an etching rate of  $\sim 2$  nm per 10 s.

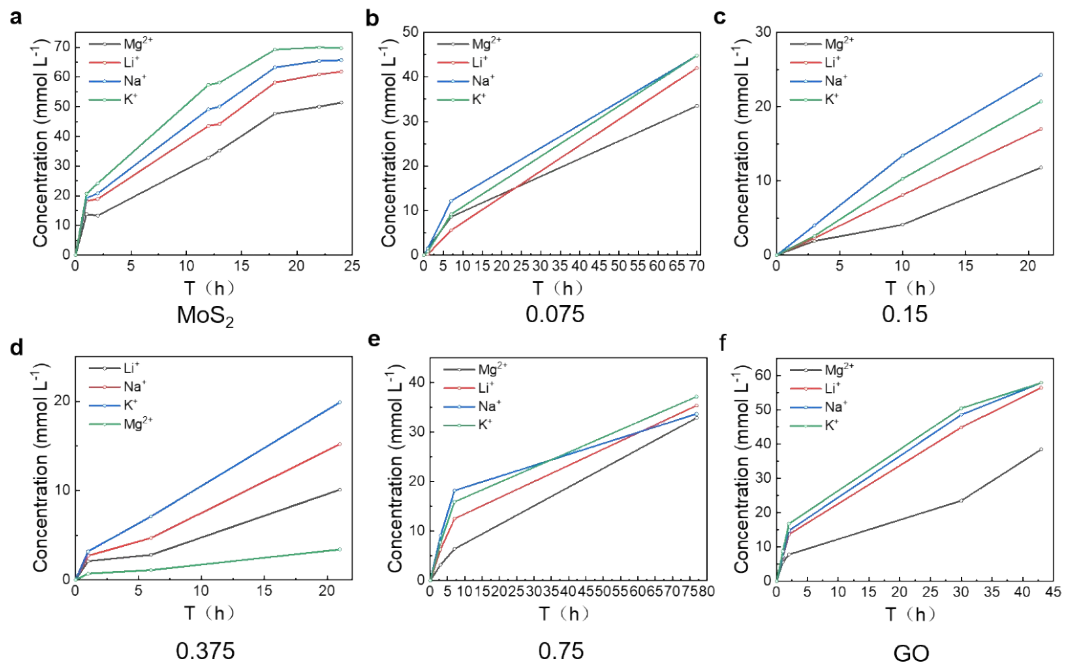

**Figure S8.** Water side concentration of GO-MoS<sub>2</sub> membranes with different MoS<sub>2</sub>/GO ratio (based on the molar ratio of MoS<sub>2</sub> and C units).

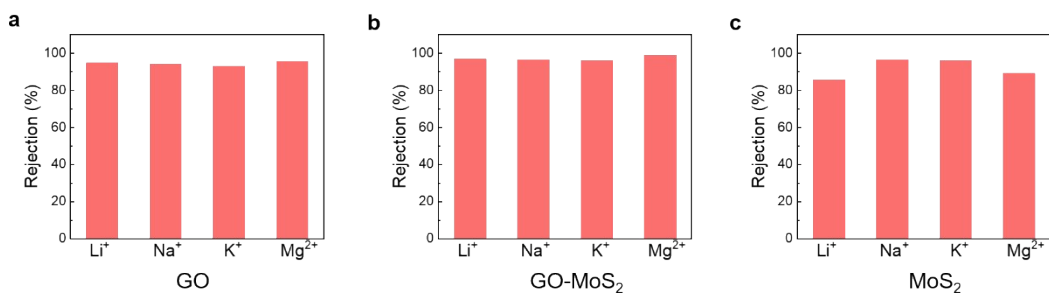

**Figure S9.** Rejections comparison for different ions indicate excellent desalination performance of GO-MoS<sub>2</sub> membrane.

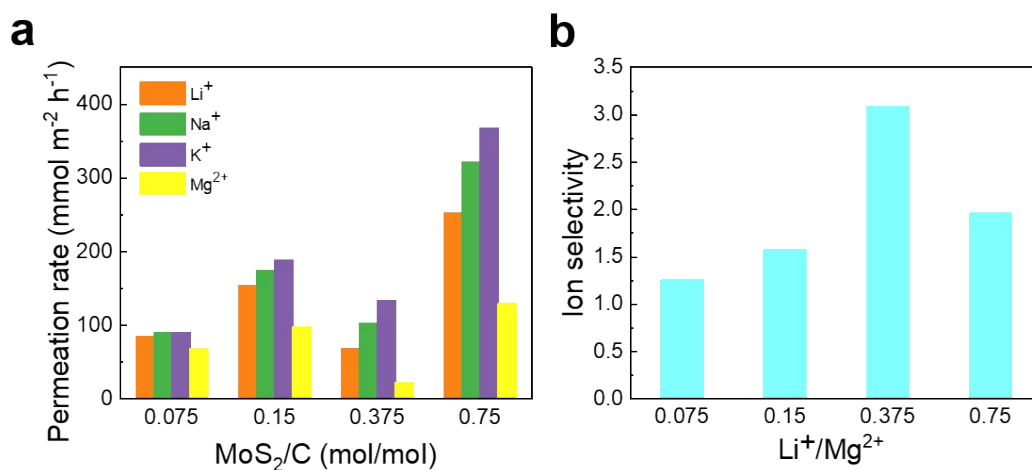

**Figure S10.** (a,b) Ion permeation rate of GO-MoS<sub>2</sub> membranes with different MoS<sub>2</sub>/GO ratio (based on the molar ratio of MoS<sub>2</sub> and C units), (a) and the corresponding Li<sup>+</sup>/Mg<sup>2+</sup> ratio (b).

**Table S1.** Physical properties of ions studied in our work <sup>1-3</sup>.

| Ion              | Bare diameter (Å) | Hydrated diameter (Å) |
|------------------|-------------------|-----------------------|
| Li <sup>+</sup>  | 1.20              | 7.64                  |
| Na <sup>+</sup>  | 1.90              | 7.16                  |
| K <sup>+</sup>   | 2.66              | 6.62                  |
| Mg <sup>2+</sup> | 1.30              | 8.56                  |

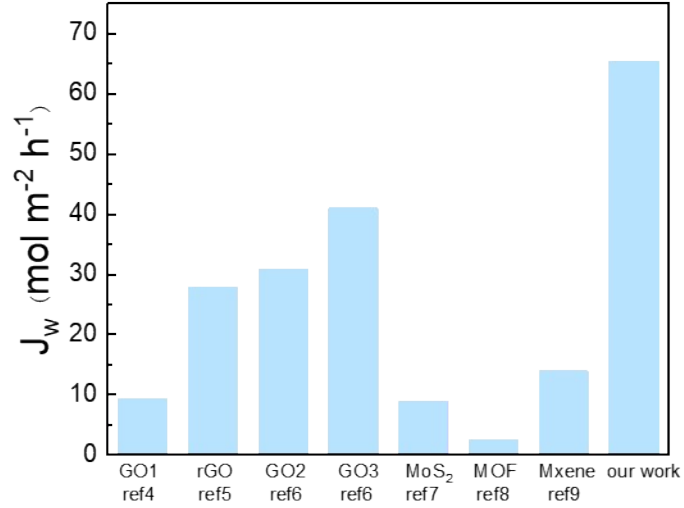

**Figure S11.** The comparison of water flux for the GO-MoS<sub>2</sub> membrane with reported publications <sup>4-9</sup>.

**Table S2.** Comparison of 2D membranes and polyamide membranes <sup>4-14</sup> (forward osmotic pressure is calculated by Van't Hoff equation ( $\Delta\pi$ )).

| Membrane materials  | Operation mode  | $\Delta\pi$ (bar) | $J_w$ (mol m <sup>-2</sup> h <sup>-1</sup> ) | $J_w/\Delta\pi$ (mol m <sup>-2</sup> h <sup>-1</sup> bar <sup>-1</sup> ) | $J_s$ (salts pieces) (mmol m <sup>-2</sup> h <sup>-1</sup> ) | Selectivity ( $J_{Si^{2+}}/J_{Mg^{2+}}$ ) | Ref.     |
|---------------------|-----------------|-------------------|----------------------------------------------|--------------------------------------------------------------------------|--------------------------------------------------------------|-------------------------------------------|----------|
| GO-MoS <sub>2</sub> | Forward osmosis | 21.92             | 65.4                                         | 2.98                                                                     | 68.0 (NaCl)                                                  | 3.08                                      | Our work |
| GO1                 | Forward osmosis | 12                | 9.44                                         | 0.79                                                                     | 190 (NaCl)                                                   | n/a                                       | [4]      |
| rGO                 | Forward osmosis | 75                | 27.8                                         | 0.37                                                                     | n/a                                                          | n/a                                       | [5]      |
| GO2                 | Forward osmosis | 24.46             | 30.83                                        | 1.26                                                                     | 6.11 (NaCl)                                                  | n/a                                       | [6]      |
| GO3                 | Forward osmosis | 24.46             | 41.07                                        | 1.68                                                                     | 13.8 (NaCl)                                                  | n/a                                       | [6]      |
| MoS <sub>2</sub>    | Forward osmosis | 75                | 9                                            | 0.12                                                                     | 860 (NaCl)                                                   | 0.63                                      | [7]      |
| MOF                 | Forward osmosis | 24                | 2.44                                         | 0.10                                                                     | 0.15 (NaCl)                                                  | n/a                                       | [8]      |
| MXene               | Forward osmosis | 4.89              | 13.93                                        | 2.86                                                                     | 6.7 (NaCl)                                                   | n/a                                       | [9]      |
| MCPM                | Reverse osmosis | 2                 | 750.06                                       | 375.03                                                                   | n/a                                                          | 43.9                                      | [10]     |
| PA                  | Reverse osmosis | 20                | 3000                                         | 150                                                                      | n/a                                                          | n/a                                       | [11]     |
| AQP/PA              | Reverse osmosis | 5                 | 2222.4                                       | 444.5                                                                    | n/a                                                          | n/a                                       | [12]     |
| PA/SWCNT            | Reverse osmosis | 6                 | 13334.4                                      | 2222.4                                                                   | n/a                                                          | n/a                                       | [13]     |
| PA50/CNC/PES        | Reverse osmosis | 6                 | 1133.2                                       | 1889                                                                     | n/a                                                          | n/a                                       | [14]     |



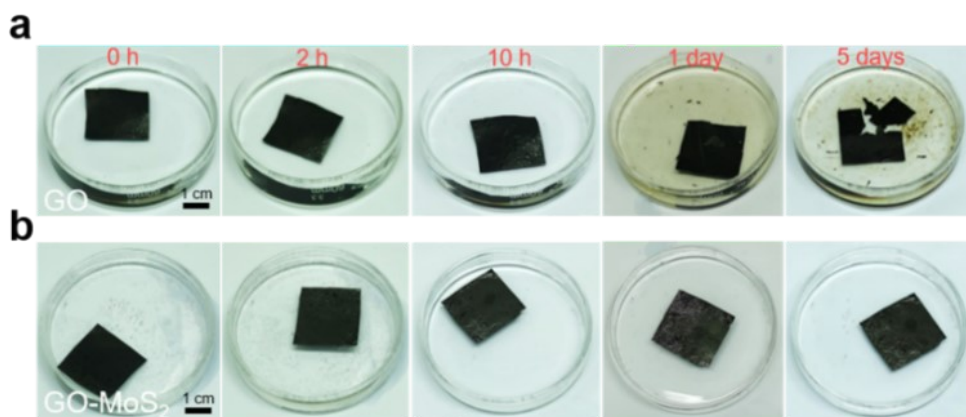

**Figure S12.** (a,b) Compared with GO membrane, GO-MoS<sub>2</sub> membrane shows significantly enhanced stability when immersing in water at 40 °C. The two samples were mildly shaken in every 5 hours.

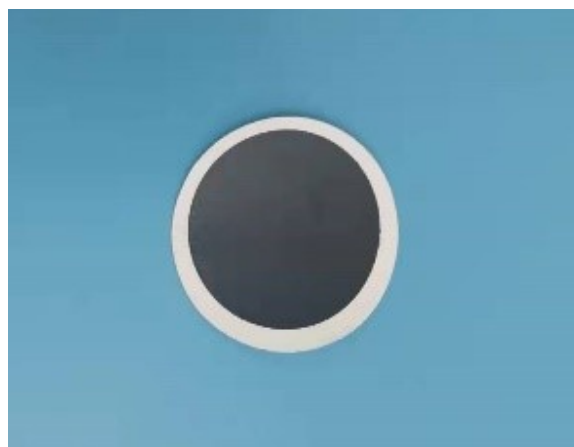

**Figure S13.** The photo of complete MoS<sub>2</sub>-GO film.

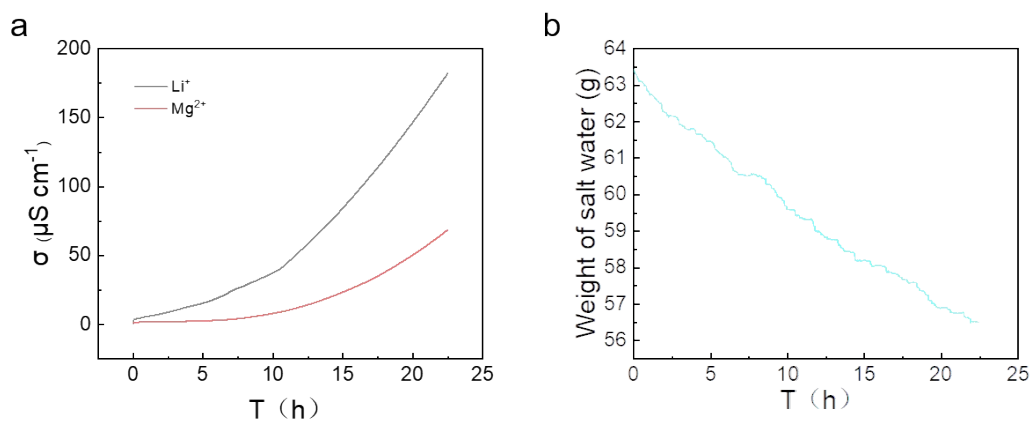

**Figure S14.** The conductivity and weight of salt water.

## 2. Experimental Section

### 2.1 Fabrication of GO-MoS<sub>2</sub> superlattice-structured membranes.

GO was prepared according to our previous report<sup>15-18</sup>. MoS<sub>2</sub> nanosheet dispersion (1 mg mL<sup>-1</sup>) was purchased from XFANO, INC (Nanjing, China). The MoS<sub>2</sub> nanosheets were dispersed in absolute ethanol by ultrasonic exfoliation for 30 min. Then the supernatant MoS<sub>2</sub> dispersion was obtained through centrifugation at 3000 rpm for 30 min. GO-MoS<sub>2</sub> membrane was prepared by a simple process where MoS<sub>2</sub> nanosheets dispersion was added dropwise into large-sized GO nanosheets dispersion and subsequently stood for self-assembly. Then superlattice-structured GO-MoS<sub>2</sub> membrane was formed after vacuum filtration and drying. The membranes' nylon hydrophilic bases were purchased from Titan.

### 2.2 Rejections and Desalination Performance Evaluation.

The water flux ( $J_w$ ) was derived from the difference of liquid volume on the permeate side or the draw side ( $\Delta V$ ) with time ( $\Delta t$ ) as following equation. The feed solution is the side with salt to provide osmotic pressure. The draw solution is the side with deionized water. While  $A$  (m<sup>2</sup>) refers to the effective filtration area,  $\Delta t$  (h) is the filtration time.

$$J_w = \frac{\Delta V}{A \times \Delta t} \quad (1)$$

The ion permeation rate ( $J_s$ ) through membranes could be calculated as the following equation

$$J_s = \frac{C \times V}{A \times \Delta t} \quad (2)$$

where  $C$  is the concentration of salt in the draw side,  $V$  is the total volume of draw solution,  $A$  is the effective membrane area, and  $\Delta t$  is the permeation time. The rotation speed of the magnetic stirrers in both sides was set up at 250 rpm to minimize concentration polarization. The feed solution is the side with salt to provide osmotic pressure. The draw solution is the side with deionized water.

$$R = \frac{C_0 - C}{C_0} \times 100\% \quad (3)$$

$C_0$  and  $C$  are the salt concentrations of the feed and draw solutions, respectively.

A set of home-made, H-type cell (volume 50 mL) was employed for liquid filtration test (Figure 4a). Our GO-MoS<sub>2</sub> membrane was fixed between the feed and permeate compartments by two O-rings to provide a leakfree environment. And 50 ml of 0.1 M salt (NaCl or MgCl<sub>2</sub>) aqueous solution and deionized water were filled into feed

and permeate compartments, respectively. All solutions were under stirring at 250 rpm and room temperature. The permeated salts were measured using Inductively coupled plasma optical emission spectrometer (ICP-OES) on an iCAP 7400 Radial.

### **2.3 Characterizations.**

XRD was performed on a Bruker D8 Advance using a Cu K $\alpha$  ( $\lambda = 1.5418 \text{ \AA}$ ) radiation source. Small angle x-ray scattering system (SAXS) was performed on a Xenocs 2.0 using a Cu GeniX3D radiation source with a Pilatus 3 100K/300K detector. Inductively coupled plasma optical emission spectrometer (ICP-OES) was conducted on an iCAP 7400 Radial. SEM patterns were recorded using a JEOL JSM-7800F. Transmission electron microscopy (TEM) observation was conducted using a JEOL F200 equipped with a field emission gun. XPS spectra was recorded with the ThermoFisher ESCA 250XI using an Al K $\alpha$  ( $\lambda = 0.83 \text{ nm}$ ,  $h\nu = 1486.7 \text{ eV}$ ). And, the X-ray source was operated at 2 kV, 20 mA. Profile XPS was conducted using Tantalum oxide ( $\text{Ta}_2\text{O}_5$ ) with a sputter rate of 10 nm/min.

### **2.4 Computational methods**

The calculation of first principle theory is supported by the Vienna ab initio simulation package (VASP). The projected augmented wave potentials (PAW)<sup>19</sup> was chosen to describe the ionic cores. And the exchange-correlation part of the density functional was conducted by the generalized gradient approximation (GGA) of Perdew-Burke-Ernzerhof (PBE)<sup>20</sup>. The convergence criteria were set to 0.01 eV  $\text{\AA}^{-1}$  and  $10^{-5}$  eV for the residual force and energy during structure relaxation.

The equilibrium lattice constants of  $\text{MoS}_2/\text{GO}$  heterogeneous were optimized to be  $a=12.40 \text{ \AA}$ ,  $b=12.40 \text{ \AA}$  and  $c=11.3 \text{ \AA}$ . These lattice constants were used to build the  $\text{MoS}_2$  (001) surface slab with 1 atomic layers, which contains 16 Mo and 32 S atoms, and the C (002) surface slab with 1 atomic layers, which contains 50 C atoms. During structural optimizations of the models, a  $3 \times 3 \times 1$  gamma-point centered k-point grid for Brillouin zone was used and all the atoms were allowed to fully relax.

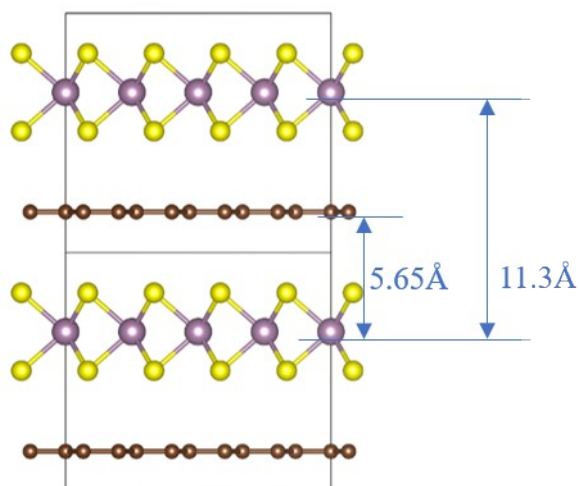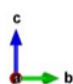

**Figure S15.** The structure of MoS<sub>2</sub>/GO.

The binding energy of M (M = Na, K, Li, Mg) was defined as:

$$E_V = E_b - E_p - E_A \quad (4)$$

Where  $E_b$ ,  $E_p$  and  $E_A$  are the energy of the MoS<sub>2</sub>-M-GO sandwich structure, the energy of MoS<sub>2</sub>-GO, and the energy of M atom in the lattice, respectively.

The difference in the spacing between the layers of molybdenum disulfide and graphene oxide in the experiments and first-principles calculations can be explained by the difference in functional groups. GO is used in actual experiments, which has oxygen atoms, hydroxyl groups and carboxyl groups on its surface. The polarity introduced by these functional groups and their volume will increase the distance between the two sides.

## References

- 1 H. Binder and O. Zschornig, *Chem. Phys. Lipids*, 2002, **115**, 39-61.
- 2 B. E. Conway and E. Ayranci, *Journal of Solution Chemistry*, 1999, **28**, 163-192.
- 3 A. G. Volkov, S. Paula and D. W. Deamer, *Bioelectrochemistry and Bioenergetics*, 1997, **42**, 153-160.
- 4 L. Chen, G. Shi, J. Shen, J. Li and H. Fang, *Nature*, 2017, **550**, 380-383.
- 5 J. Abraham, K. S. Vasu, C. D. Williams, K. Gopinadhan, Y. Su, C. T. Cherian, J. Dix, E. Prestat, S. J. Haigh, I. V. Grigorieva, P. Carbone, A. K. Geim and R. R. Nair, *Nat. Nanotechnol.*, 2017, **12**, 546.
- 6 Y. Qian, J. Shang, D. Liu, G. Yang, X. Wang, C. Chen, L. Kou and W. Lei, *J. Am. Chem. Soc.*, 2021, **143**, 5080-5090.
- 7 M. Deng, K. Kwac, M. Li, Y. Jung and H. G. Park, *Nano Lett.*, 2017, **17**, 2342-2348.
- 8 M. P. Jian, R. S. Qiu, Y. Xia, J. Lu, Y. Chen, Q. F. Gu, R. P. Liu, C. Z. Hu, J. H. Qu, H. T. Wang and X. W. Zhang, *Sci. Adv.*, 2020, **6**.

- 9 Z. Lu, Y. Y. Wei, J. J. Deng, L. Ding, Z. K. Li and H. H. Wang, *Acs Nano*, 2019, **13**, 10535-10544.
- 10 J. Zhao, X. You, G. Wang, J. Yuan, Y. Li, C. Yang, S. Zhang, X. Wang, R. Zhang, H. Wu and Z. Jiang, *J. Membrane Sci.*, 2022, **644**.
- 11 Z. Jiang, S. Karan and A. G. Livingston, *Adv. Mater.*, 2018, **30**, e1705973.
- 12 X. Li, S. Chou, R. Wang, L. Shi, W. Fang, G. Chaitra, C. Y. Tang, J. Torres, X. Hu and A. G. Fane, *J. Membrane Sci.*, 2015, **494**, 68-77.
- 13 S. Gao, Y. Zhu, Y. Gong, Z. Wang, W. Fang and J. Jin, *ACS Nano*, 2019, **13**, 5278-5290.
- 14 J.-J. Wang, H.-C. Yang, M.-B. Wu, X. Zhang and Z.-K. Xu, *J Mater. Chem. A*, 2017, **5**, 16289-16295.
- 15 J. Zhang, Q. Liu, Y. Ruan, S. Lin, K. Wang and H. Lu, *Chem. Mater.*, 2018, **30**, 1888-1897.
- 16 L. Dong, Z. Chen, S. Lin, K. Wang, C. Ma and H. Lu, *Chem. Mater.*, 2017, **29**, 564-572.
- 17 L. Dong, J. Yang, M. Chhowalla and K. P. Loh, *Chem. Soc. Rev.*, 2017, **46**, 7306-7316.
- 18 L. Dong, L. Zhang, S. Lin, Z. Chen, Y. Wang, X. Zhao, T. Wu, J. Zhang, W. Liu, H. Lu and K. P. Loh, *Nano Energy*, 2020, **70**, 104482.
- 19 G. Kresse and J. Furthmüller, *Phys. Rev. B*, 1996, **54**, 11169–11186.
- 20 John P. Perdew, Kieron Burke and a. M. Ernzerhof, *Phys. Rev. Lett.*, 1996, **77**, 3865–3868.
